# Supplementary material for: Temporal variability in the growth-enhancing effects of different bacteria within the microbiome of the diatom Actinocyclus sp
Source: Front Microbiol. 2023 Aug 7;14:1230349. doi: 10.3389/fmicb.2023.1230349 (PMC10440540; doi:10.3389/fmicb.2023.1230349)
Supplement: Supplementary file 1 [file Data_Sheet_1.xlsx]

## Sheet: Table S1
	Table S1: Primer sequences used for algae and bacteria PCR
	Primer	Sequence (5' - 3')	Reference
	27-F	AGAGTTTGATCMTGGCTCAG	Lane et al., 1991 1
	1492-R	ACCTTGTTACGACTT	Lane et al., 1991 1
	18Smoon-F	ACCTGGTTGATCCTGCCAG	Moon‐van der Staay et al., 2000 2
	18Smoon-R	TGATCCTTCYGCAGGTTCAC	Moon‐van der Staay et al., 2000 2
	V1 (= 27F)	AGAGTTTGATCMTGGCTCAG	Lane et al., 1991 1
	V3 (= 519r)	GWATTACCGCGGCKGCTG	Turner et al., 1999 4
	1 Lane, D. 1. (1991). 16S/23S rRNA sequencing. Nucleic acid techniques in bacterial systematics, 115-175.Initiative. Scientific data, 5(1), 1-10.
	2 Moon‐van der Staay, S.Y., van der Staay, G.W., Guillou, L., Vaulot, D., Claustre, H. and Medlin, L.K., 2000. Abundance and diversity of prymnesiophytes in the picoplankton coμmunity from the equatorial Pacific Ocean inferred from 18S rDNA
	3 Scholin, C. A., Herzog, M., Sogin, M., & Anderson, D. M. (1994). Identification of group‐and strain‐specific genetic markers for globally distributed Alexandrium (Dinophyceae). ii. sequence analysis of a fragment of the LSU rRNA gene 1. Journal of phycology, 30(6), 999-1011.
	4 Turner, S., Pryer, K.M., Miao, V.P.W., and Palmer, J.D. 1999. Investigating deep phylogenetic relationships among cyanobacteria and plastids by small subunit rRNA sequence analysis. Journal of Eukaryotic Microbiology 46: 327–338.Initiative. Scientific data, 5(1), 1-10.

## Sheet: Table S2
	Table S2: Taxonomy of the 151 bacterial isolates derived from our phytoplankton cultures. Coloured rows correspond to the bacterial isolates used for pre-screening and bacteria code in bold correspond to the bacteria used in the co-culture experiments.
	Bacteria ID	Bacteria code	Bacteria origin	NCBI Taxonomy (Sanger sequencing, 27F-1492R)	Query cover (%)	E-value	Percent identity	Accession number	Percent Identity match with ASVs from Actinocyclus microbiome
	d4	b45	Chaetoceros sp.	Oceanospirillum linum strain XH073 16S ribosomal RNA gene, partial sequence	100	0	99.8	KF424812	-
	d5.2	-	Cerataulina pelagica	Pseudoalteromonas phenolica strain AX-O-9 16S ribosomal RNA gene, partial sequence	100	0	99.9	MW828484	-
	d5.3	b9	Cerataulina pelagica	Vibrio sp. S2222 16S ribosomal RNA gene, partial sequence	100	0	99.2	FJ457425	> 97%
	d5.4	-	Cerataulina pelagica	Uncultured Thalassobius sp. clone DOM07 16S ribosomal RNA gene, partial sequence	88.48	0	98.8	HQ012272	-
	d5.5	-	Cerataulina pelagica	Vibrio penaeicida strain NBRC 15640 16S ribosomal RNA, partial sequence	100	0	99.3	NR_113790	-
	d5.7	-	Cerataulina pelagica	Vibrio chagasii strain 3-7 16S ribosomal RNA gene, partial sequence	100	0	99.6	MN938232	-
	d5.8	-	Cerataulina pelagica	Vibrio sp. strain 03XY1 16S ribosomal RNA gene, partial sequence	100	0	97.7	OQ472338	-
	d5.9	-	Cerataulina pelagica	Vibrio sp. strain 03XY1 16S ribosomal RNA gene, partial sequence	100	0	97.9	OQ472338	-
	d5.10	-	Cerataulina pelagica	Vibrio sp. strain 03XY1 16S ribosomal RNA gene, partial sequence	100	0	97.6	OQ472338	-
	d5.b1	-	Cerataulina pelagica	Vibrio gigantis strain Mu-113 16S ribosomal RNA gene, partial sequence	100	0	98	OP889032	-
	d5.b2	-	Cerataulina pelagica	Vibrio gigantis strain Mu-61 16S ribosomal RNA gene, partial sequence	100	0	98	OP889031	-
	d5.20	-	Cerataulina pelagica	Vibrio gigantis strain Mu-61 16S ribosomal RNA gene, partial sequence	100	0	99.1	OP889031	-
	d5.22a	-	Cerataulina pelagica	Vibrio gigantis strain Mu-61 16S ribosomal RNA gene, partial sequence	100	0	98.9	OP889031	-
	d5.22b	-	Cerataulina pelagica	Vibrio gigantis strain Mu-61 16S ribosomal RNA gene, partial sequence	100	0	99.2	OP889031	-
	d6.1	b3	Chaetoceros sp.	Pseudoalteromonas piratica strain ROD185 16S ribosomal RNA gene, partial sequence	99.93	0	99.6	OQ600618	-
	d6.3	-	Chaetoceros sp.	Tenacibaculum litoreum strain P080 16S ribosomal RNA gene, partial sequence	99.63	0	97.1	OP343276	-
	d6.4	-	Chaetoceros sp.	Vibrio penaeicida strain NBRC 15640 16S ribosomal RNA, partial sequence	100	0	99.4	NR_113790	-
	d6.6	b12	Chaetoceros sp.	Thalassobius sp. strain Cn5-15 16S ribosomal RNA gene, partial sequence	100	0	97.9	OL549311	-
	d6.6a	-	Chaetoceros sp.	Uncultured Alteromonadaceae bacterium clone MD3.28 16S ribosomal RNA gene, partial sequence	100	0	99.7	FJ425616	-
	d6.6b	-	Chaetoceros sp.	Uncultured Alteromonadaceae bacterium clone MD3.28 16S ribosomal RNA gene, partial sequence	100	0	99.6	FJ425616	-
	d6.8	b6	Chaetoceros sp.	Thalassotalea loyana strain CBMAI 722 16S ribosomal RNA, partial sequence	100	0	99.3	NR_043066	-
	d6.9	b4	Chaetoceros sp.	Shimia sp. strain R-82923 16S ribosomal RNA gene, partial sequence	100	0	99.3	OM959194	-
	d6.10	-	Chaetoceros sp.	Gaetbulibacter sp. strain MEBiC01158 16S ribosomal RNA gene, partial sequence	100	0	95.5	ON778606	-
	d6.11	-	Chaetoceros sp.	Marinomonas sp. strain 1705B29a 16S ribosomal RNA gene, partial sequence	90	0	98.76	MG833246	-
	d6.12	-	Chaetoceros sp.	Pseudoalteromonas sp. C345 16S ribosomal RNA gene, partial sequence	99.9	0	99.2	NR_113299	-
	d6.13	-	Chaetoceros sp.	Pseudoalteromonas phenolica strain JCM 21460 16S ribosomal RNA, partial sequence	100	0	99.9	OQ600618	-
	d6.14	-	Chaetoceros sp.	Marinomonas sp. strain 1709B17a 16S ribosomal RNA gene, partial sequence	80	0	97.98	MG010449.1	-
	d6.15	-	Chaetoceros sp.	Vibrio penaeicida strain NBRC 15640 16S ribosomal RNA, partial sequence	99.35	0	99.3	NR_113790	-
	d6.16	-	Chaetoceros sp.	Thalassotalea loyana strain CBMAI 722 16S ribosomal RNA, partial sequence	100	0	97.6	NR_043066	-
	d6.17	-	Chaetoceros sp.	Pseudoalteromonas phenolica strain AX-O-9 16S ribosomal RNA gene, partial sequence	100	0	99.8	MW828484	-
	d6.18	-	Chaetoceros sp.	Vibrio sp. strain MEDF9-4-1 16S ribosomal RNA gene, partial sequence	100	0	99.8	ON527619	-
	d7.1	-	Chaetoceros sp.	Psychroserpens sp. 9m2or 16S ribosomal RNA gene, partial sequence	100	0	95.3	JQ661251	-
	d7.2	-	Chaetoceros sp.	Pseudoalteromonas phenolica strain JCM 21460 16S ribosomal RNA, partial sequence	100	0	99.8	NR_113299	-
	d7.4	b1	Chaetoceros sp.	Marinomonas posidonica strain HN-3-5-1 16S ribosomal RNA gene, partial sequence	100	0	99.42	MW131316	-
	d7.5	b30	Chaetoceros sp.	Uncultured Thalassobius sp. clone DOM07 16S ribosomal RNA gene, partial sequence	100	0	99.8	HQ012272	> 97%
	d7.7	b44	Chaetoceros sp.	Tenacibaculum sp. strain CN5-34 16S ribosomal RNA gene, partial sequence	100	0	96.3	OL549289	-
	d7.8	-	Chaetoceros sp.	Pseudoalteromonas phenolica strain ATM_04 16S ribosomal RNA gene, partial sequence	100	0	99.9	MW828427	-
	d7.9	-	Chaetoceros sp.	Vibrio fortis strain 2.1 16S ribosomal RNA gene, partial sequence	100	0	99.8	MZ081631	-
	d7.10	-	Chaetoceros sp.	Marinomonas posidonica strain HN-3-5-1 16S ribosomal RNA gene, partial sequence	99.48	0	88	MW131316	-
	d7.11	-	Chaetoceros sp.	Pseudoalteromonas phenolica strain AX-O-9 16S ribosomal RNA gene, partial sequence	100	0	100	MW828484	-
	d7.12	-	Chaetoceros sp.	Pseudoalteromonas piratica strain OCN003 16S ribosomal RNA, partial sequence	100	0	99.3	NR_157758	-
	d7.13	b37	Chaetoceros sp.	Uncultured Thalassobius sp. clone DOM07 16S ribosomal RNA gene, partial sequence	100	0	99.81	HQ012272.1	> 97%
	d7.14	-	Chaetoceros sp.	Vibrio penaeicida strain NBRC 15640 16S ribosomal RNA, partial sequence	100	0	99.3	NR_113790	-
	d7.15	b36	Chaetoceros sp.	Vibrio penaeicida strain V097 16S ribosomal RNA gene, partial sequence	100	0	99.9	JF836188.1	-
	d7.16	-	Chaetoceros sp.	Tenacibaculum sp. C28 16S ribosomal RNA gene, partial sequence	95.76	0	92.5	JX853817	-
	d7.17	b2	Chaetoceros sp.	Vibrio penaeicida strain NBRC 15640 16S ribosomal RNA, partial sequence	100	0	99.2	NR_113790	-
	d7.18	-	Chaetoceros sp.	Pseudoalteromonas sp. strain SA30_2 16S ribosomal RNA gene, partial sequence	100	0	99.6	OQ726659	-
	d7.19	-	Chaetoceros sp.	Vibrio sp. strain 03XY1 16S ribosomal RNA gene, partial sequence	100	0	96.99	OQ472338	-
	d7.20	-	Chaetoceros sp.	Enterovibrio norvegicus strain F059 16S ribosomal RNA gene, partial sequence	99.66	0	99.2	OP342894	-
	d8.1	b42	Lauderia ca. annulata	Thalassotalea loyana strain CBMAI 722 16S ribosomal RNA, partial sequence	100	0	98.5	NR_043066	-
	d8.2	-	Lauderia ca. annulata	Vibrio penaeicida strain NBRC 15640 16S ribosomal RNA, partial sequence	100	0	99.5	NR_113790	-
	d8.3	b8	Lauderia ca. annulata	Vibrio sp. strain 06DJD4 16S ribosomal RNA gene, partial sequence	100	0	99.7	OQ553680	-
	d8.4	-	Lauderia ca. annulata	Pseudoalteromonas phenolica strain AX-O-9 16S ribosomal RNA gene, partial sequence	100	0	97.9	MW828484	-
	d8.5	-	Lauderia ca. annulata	Vibrio fortis strain SCSIO_43716 16S ribosomal RNA gene, partial sequence	84	0	97.93	MH283800	-
	d8.6	-	Lauderia ca. annulata	Altererythrobacter insulae strain BPTF-M16 16S ribosomal RNA, partial sequence	100	0	98.5	NR_180053	-
	d8.7	-	Lauderia ca. annulata	Vibrio sp. strain 03XY1 16S ribosomal RNA gene, partial sequence	100	0	98.1	OQ472338	-
	d8.8	-	Lauderia ca. annulata	Enterovibrio norvegicus strain F059 16S ribosomal RNA gene, partial sequence	99.71	0	99.3	OP342894	-
	d8.9	b43	Lauderia ca. annulata	Thalassotalea loyana strain CBMAI 722 16S ribosomal RNA, partial sequence	100	0	98.5	NR_043066	-
	d8.10	-	Lauderia ca. annulata	Thalassotalea loyana strain CBMAI 722 16S ribosomal RNA, partial sequence	84	0	96.85	NR_043066	-
	d8.11	-	Lauderia ca. annulata	Cytophaga sp. IAJ12 16S ribosomal RNA gene, partial sequence	75	0	94.33	JN391171	-
	d10.1	b24	Cylindrotheca closterium	Shimia sp. strain R-82923 16S ribosomal RNA gene, partial sequence	99.32	0	98.2	OM959194	-
	d10.4	-	Cylindrotheca closterium	Shimia haliotis strain WM35 16S ribosomal RNA, partial sequence	100	0	99	NR_109739	-
	d10.5	b25	Cylindrotheca closterium	Shimia thalassica strain CECT 7735 (R47) 16S ribosomal RNA, partial sequence	100	0	100	NR_170514	> 97%
	d10.6	-	Cylindrotheca closterium	Shimia thalassica strain CECT 7735 (R47) 16S ribosomal RNA, partial sequence	93.33	0	97.9	NR_170514	-
	d10.7	b39	Cylindrotheca closterium	Shimia thalassica strain CECT 7735 (R47) 16S ribosomal RNA, partial sequence	100	0	100	NR_170514	-
	d10.8	-	Cylindrotheca closterium	Shimia haliotis strain WM35 16S ribosomal RNA, partial sequence	100	0	99.5	NR_109739	-
	d10.9	b26	Cylindrotheca closterium	Shimia sp. strain R-82923 16S ribosomal RNA gene, partial sequence	100	0	99.2	OM959194	-
	d10.11	-	Cylindrotheca closterium	Shimia haliotis strain WM35 16S ribosomal RNA, partial sequence	100	0	99	NR_109739	-
	d10.13a	-	Cylindrotheca closterium	Winogradskyella sp. PC-19 genome	100	0	99.7	CP019332	-
	d10.13b	-	Cylindrotheca closterium	Phaeobacter sp. UDC400 16S ribosomal RNA gene, partial sequence	100	0	98.9	HM031990	-
	d10.14a	-	Cylindrotheca closterium	Phaeobacter sp. UDC400 16S ribosomal RNA gene, partial sequence	100	0	99.5	HM031990	-
	d10.14b	-	Cylindrotheca closterium	Winogradskyella sp. PC-19 genome	100	0	100	CP019332	-
	d10.15	b41	Cylindrotheca closterium	Shimia haliotis strain WM35 16S ribosomal RNA, partial sequence	100	0	99.9	NR_109739	-
	d10.16	-	Cylindrotheca closterium	Phaeobacter sp. UDC400 16S ribosomal RNA gene, partial sequence	100	0	99.2	HM031990	-
	d10.17	-	Cylindrotheca closterium	Phaeobacter sp. UDC400 16S ribosomal RNA gene, partial sequence	100	0	99	HM031990	-
	d10.18	-	Cylindrotheca closterium	Phaeobacter sp. UDC400 16S ribosomal RNA gene, partial sequence	100	0	98.9	HM031990	-
	d10.20	-	Cylindrotheca closterium	Shimia thalassica strain CECT 7735 (R47) 16S ribosomal RNA, partial sequence	100	0	98.8	NR_170514	-
	d10.22	-	Cylindrotheca closterium	Phaeobacter sp. UDC400 16S ribosomal RNA gene, partial sequence	100	0	98.9	HM031990	-
	d10.24	-	Cylindrotheca closterium	Phaeobacter sp. UDC400 16S ribosomal RNA gene, partial sequence	99.74	0	98.2	HM031990	-
	d10.b1	-	Cylindrotheca closterium	Vibrio penaeicida strain NBRC 15640 16S ribosomal RNA, partial sequence	100	0	98.6	NR_113790	-
	d10.b2	-	Cylindrotheca closterium	Vibrio penaeicida strain NBRC 15640 16S ribosomal RNA, partial sequence	100	0	97.19	NR_042121	-
	d10.b3	-	Cylindrotheca closterium	Vibrio penaeicida strain NBRC 15640 16S ribosomal RNA, partial sequence	100	0	99.2	NR_113790	-
	d10.b4	b27	Cylindrotheca closterium	Shimia thalassica strain CECT 7735 (R47) 16S ribosomal RNA, partial sequence	100	0	99.9	NR_170514	-
	d10.b6	-	Cylindrotheca closterium	Vibrio penaeicida strain NBRC 15640 16S ribosomal RNA, partial sequence	100	0	98.7	NR_113790	-
	d10.b7	-	Cylindrotheca closterium	Vibrio penaeicida strain NBRC 15640 16S ribosomal RNA, partial sequence	100	0	99.3	NR_113790	-
	d10.b8	-	Cylindrotheca closterium	Alteromonas mediterranea strain S032 16S ribosomal RNA gene, partial sequence	100	0	99.1	OP343596	-
	d10.b9	-	Cylindrotheca closterium	Denitrobaculum tricleocarpae strain R148 16S ribosomal RNA, partial sequence	99.81	0	99.3	NR_170441	-
	d10.b10	-	Cylindrotheca closterium	Alteromonas mediterranea strain W125 16S ribosomal RNA gene, partial sequence	99.36	0	98.2	OP344098	-
	d10.b11	-	Cylindrotheca closterium	Alteromonas mediterranea strain W125 16S ribosomal RNA gene, partial sequence	99.2	0	97.1	OP344098	-
	d10.b12	b28	Cylindrotheca closterium	Shimia thalassica strain CECT 7735 (R47) 16S ribosomal RNA, partial sequence	100	0	99.7	NR_170514	-
	d10.b13	b29	Cylindrotheca closterium	Vibrio penaeicida strain NBRC 15640 16S ribosomal RNA, partial sequence	100	0	99.1	NR_113790	-
	d10.b14	b32	Cylindrotheca closterium	Vibrio penaeicida strain IMCC34213 16S ribosomal RNA gene, partial sequence	100	0	99.2	MG456780	-
	d10.b15	b34	Cylindrotheca closterium	Alteromonas mediterranea strain PT15 chromosome, complete genome	100	0	99.7	CP004848	> 97%
	d10.b16	-	Cylindrotheca closterium	Alteromonas mediterranea strain S118 16S ribosomal RNA gene, partial sequence	99	0	98	OP343676	-
	d10.b17	-	Cylindrotheca closterium	Denitrobaculum tricleocarpae strain R148 16S ribosomal RNA, partial sequence	99.82	0	99.5	NR_170441	-
	d14.1	-	diatom culture	Tenacibaculum aestuarii strain ROC007 16S ribosomal RNA gene, partial sequence	100	0	95.5	OK067210	-
	d14.2	-	diatom culture	Vibrio penaeicida strain NBRC 15640 16S ribosomal RNA, partial sequence	100	0	98.8	NR_113790	-
	d14.3	-	diatom culture	Vibrio chagasii strain 3-7 16S ribosomal RNA gene, partial sequence	100	0	99.5	MN938232	-
	d14.4	-	diatom culture	Altererythrobacter sp. strain ESS-24 16S ribosomal RNA gene, partial sequence	100	0	99.2	MH057249	-
	d14.5	-	diatom culture	Pseudoalteromonas phenolica strain AX-O-9 16S ribosomal RNA gene, partial sequence	100	0	99.7	MW828484	-
	d14.6	-	diatom culture	Vibrio sp. strain 03XY1 16S ribosomal RNA gene, partial sequence	100	0	98.6	OQ472338	-
	d14.7	b10	diatom culture	Shimia haliotis strain WM35 16S ribosomal RNA, partial sequence	100	0	98.8	NR_109739	-
	d16.1	b13	Actinocyclus sp.	Shimia sp. strain R-82923 16S ribosomal RNA gene, partial sequence	100	0	99.5	OM959194	-
	d16.2	b14	Actinocyclus sp.	Shimia sp. strain R-82923 16S ribosomal RNA gene, partial sequence	100	0	99.6	OM959194	> 99%
	d16.3	b15	Actinocyclus sp.	Shimia sp. strain R-82923 16S ribosomal RNA gene, partial sequence	100	0	99.2	OM959194	> 99%
	d16.4	-	Actinocyclus sp.	Vibrio sp. strain 03XY1 16S ribosomal RNA gene, partial sequence	100	0	98.3	OQ472338	-
	d16.5	-	Actinocyclus sp.	Pseudoalteromonas phenolica strain AX-O-9 16S ribosomal RNA gene, partial sequence	100	0	99.4	MW828484	-
	d16.6	-	Actinocyclus sp.	Vibrio penaeicida strain NBRC 15640 16S ribosomal RNA, partial sequence	100	0	99.1	NR_113790	-
	d16.7	-	Actinocyclus sp.	Qipengyuania sp. strain SP6 16S ribosomal RNA gene, partial sequence	100	0	99.3	OQ726664	-
	d16.8	-	Actinocyclus sp.	Pseudophaeobacter sp. strain JLT14 16S ribosomal RNA gene, partial sequence	99.91	0	98.8	KX989223	-
	d16.9	b21	Actinocyclus sp.	Shimia sp. AI_93 gene for 16S ribosomal RNA, partial sequence	100	0	99.2	LC543516	-
	d16.10	b16	Actinocyclus sp.	Pseudoalteromonas phenolica strain ATM_04 16S ribosomal RNA gene, partial sequence	100	0	100	MW828427	-
	d16.11	-	Actinocyclus sp.	Altererythrobacter sp. strain ESS-24 16S ribosomal RNA gene, partial sequence	100	0	98.3	MH057249	-
	d16.12	b17	Actinocyclus sp.	Shimia sp. strain R-82923 16S ribosomal RNA gene, partial sequence	100	0	99.6	OM959194	-
	d16.13	b18	Actinocyclus sp.	Pseudoalteromonas phenolica strain IMCC34178 16S ribosomal RNA gene, partial sequence	100	0	100	MG456775	> 98%
	d16.14	b19	Actinocyclus sp.	Shimia sp. strain R-82923 16S ribosomal RNA gene, partial sequence	99.85	0	99.2	OM959194	-
	d16.15	-	Actinocyclus sp.	Vibrio sp. strain 06DJD4 16S ribosomal RNA gene, partial sequence	100	0	99.3	OQ553680	-
	d16.16	-	Actinocyclus sp.	Vibrio sp. strain 06DJD4 16S ribosomal RNA gene, partial sequence	100	0	99.6	OQ553680	-
	d16.17	b5	Actinocyclus sp.	Vibrio fortis strain SFVB05 16S ribosomal RNA gene, partial sequence	99.79	0	98.2	OK037006	-
	d16.18	b40	Actinocyclus sp.	Vibrio chagasii strain 3-7 16S ribosomal RNA gene, partial sequence	95	0	96.51	MN938232	-
	d16.19	b20	Actinocyclus sp.	Pseudoalteromonas phenolica strain IMCC34178 16S ribosomal RNA gene, partial sequence	100	0	100	MG456775	> 98%
	d16.22	b22	Actinocyclus sp.	Shimia sp. AI_93 gene for 16S ribosomal RNA, partial sequence	100	0	99	LC543516	-
	d16.42a	-	Actinocyclus sp.	Pseudoalteromonas phenolica strain ATM_04 16S ribosomal RNA gene, partial sequence	100	0	99.9	MW828427	-
	d16.42b	-	Actinocyclus sp.	Pseudoalteromonas phenolica strain ATM_04 16S ribosomal RNA gene, partial sequence	99.91	0	99.6	MW828427	-
	d16.62	b23	Actinocyclus sp.	Pseudophaeobacter arcticus strain ROD150 16S ribosomal RNA gene, partial sequence	100	0	99.7	OQ186620	> 99%
	d16.72	b33	Actinocyclus sp.	Tenacibaculum sp. C28 16S ribosomal RNA gene, partial sequence	100	0	99.5	JX853817	-
	d16.82	-	Actinocyclus sp.	Tenacibaculum sp. C28 16S ribosomal RNA gene, partial sequence	100	0	99.4	JX853817	-
	d17.1	-	Helicotheca sp.	Enterovibrio norvegicus strain LMG 19839 16S ribosomal RNA, partial sequence	100	0	97.1	NR_042082	-
	d17.2	-	Helicotheca sp.	Pseudoalteromonas piratica strain OCN003 16S ribosomal RNA, partial sequence	100	0	99.6	NR_157758	-
	d17.3	b11	Helicotheca sp.	Vibrio fortis 16S ribosomal RNA gene, partial sequence	100	0	100	KP868687	-
	d17.4	-	Helicotheca sp.	Thalassotalea loyana strain CBMAI 722 16S ribosomal RNA, partial sequence	100	0	98	NR_043066	-
	d17.5	-	Helicotheca sp.	Pseudoalteromonas phenolica strain ATM_04 16S ribosomal RNA gene, partial sequence	100	0	99.9	MW828427	-
	d17.6	-	Helicotheca sp.	Pseudoalteromonas phenolica strain AX-O-9 16S ribosomal RNA gene, partial sequence	100	0	99.7	MW828484	-
	d17.7	-	Helicotheca sp.	Vibrio sp. strain 03XY1 16S ribosomal RNA gene, partial sequence	100	0	98.3	OQ472338	-
	d17.8	b7	Helicotheca sp.	Pseudoalteromonas shioyasakiensis strain P67-CTD02-4000-5 16S ribosomal RNA gene, partial sequence	100	0	99.6	FJ457425	-
	d17.8a	-	Helicotheca sp.	Pseudoalteromonas sp. strain SA28 16S ribosomal RNA gene, partial sequence	100	0	99	OQ726656	-
	d17.8b	b35	Helicotheca sp.	Uncultured Thalassobius sp. clone DOM07 16S ribosomal RNA gene, partial sequence	100	0	99.81	HQ012272	> 97%
	d17.8#1c	-	Helicotheca sp.	Pseudoalteromonas sp. strain InAD-108 16S ribosomal RNA gene, partial sequence	99	0	97.99	MF401313.1	-
	d17.8#2c	-	Helicotheca sp.	Aestuariibacter sp. strain InS-314-1 16S ribosomal RNA gene, partial sequence	100	0	97.25	MF070532.1	-
	d17.9	-	Helicotheca sp.	Enterovibrio sp. AU21 partial 16S rRNA gene, isolate AU21	82	0	97.31	LN878328.1	-
	d17.10	-	Helicotheca sp.	Enterovibrio norvegicus strain LMG 19839 16S ribosomal RNA, partial sequence	100	0	96.9	NR_042082	-
	d17.11	-	Helicotheca sp.	Thalassobius mediterraneus strain AMT_11 16S ribosomal RNA gene, partial sequence	100	0	97.6	MW828550	-
	d17.13	b31	Helicotheca sp.	Vibrio sp. S2222 16S ribosomal RNA gene, partial sequence	100	0	99.3	FJ457425	> 97%
	d17.14	-	Helicotheca sp.	Pseudoalteromonas phenolica strain AX-O-9 16S ribosomal RNA gene, partial sequence	100	0	99.5	MW828484	-
	d17.16	-	Helicotheca sp.	Vibrio fortis strain SFVB05 16S ribosomal RNA gene, partial sequence	100	0	99	OK037006	-
	d17.17	-	Helicotheca sp.	Altererythrobacter sp. strain ESS-24 16S ribosomal RNA gene, partial sequence	100	0	99.4	MH057249	-
	d17.19	b38	Helicotheca sp.	Pseudoalteromonas sp. strain SA35 16S ribosomal RNA gene, partial sequence	100	0	100	OQ726679	-
	SW5	-	Seawater	Flammeovirga arenaria strain NBRC 15982 16S ribosomal RNA, partial sequence	100	0	98.9	NR_113830	-
	SW12	-	Seawater	Flammeovirga kamogawensis strain YS10 16S ribosomal RNA, partial sequence	100	0	99	NR_041438	-
	PHSW.PY9	-	Port Hacking Seawater	Shewanella waksmanii strain ROD152 16S ribosomal RNA gene, partial sequence	100	0	98.9	OQ216730	-
	PHSW.PY23	-	Port Hacking Seawater	Shewanella sp. PH46 gene for 16S ribosomal RNA, partial sequence	100	0	99.5	LC373528	-

## Sheet: Table S3
	Table S3: Bacterial Taxonomic Identification details. Coloured rows correspond to bacterial isolates that had 100% identical 16S rRNA gene sequences.
	ID	NCBI Taxonomy (Sanger sequences, 27F-1492R)	Query cover (%)	E-value	Percent identity	Accession number
	b1	Marinomonas posidonica	100	0	99.42	MW131316
	b9	Vibrio sp. strain b9	100	0	99.2	FJ457425
	b11	Vibrio fortis	100	0	100	KP868687
	b14	Shimia sp. strain b15	100	0	99.6	OM959194
	b15	Shimia sp. strain b15	100	0	99.2	OM959194
	b18	Pseudoalteromonas phenolica	100	0	100	MG456775
	b20	Pseudoalteromonas phenolica	100	0	100	MG456775
	b23	Pseudophaeobacter sp. strain b23	100	0	99.7	OQ186620
	b25	Shimia thalassica	100	0	100	NR_170514
	b30	Thalassobius sp. strain b30	100	0	99.8	HQ012272
	b31	Vibrio sp. strain b31	100	0	99.3	FJ457425
	b34	Alteromonas mediterranea	100	0	99.61	CP004848
	b35	Thalassobius sp. strain b35	100	0	99.81	HQ012272
	b36	Vibrio penaeicida	100	0	99.9	JF836188
	b37	Thalassobius sp. strain b37	100	0	99.81	HQ012272

## Sheet: Table S4
	Table S4: Univariate Simple Main Effect test between each co-cultures and the axenic controls for each day sampled (Figure 1C and Figure 3, 5, S3, S4 and S5). SS = sum of squares; df = degrees of freedom; MS = mean of squares; F = F-value.
	ID	Species	day	SS	df	MS	F	p-value
	b1	Marinomonas posidonica	0	555.556	1	555.556	0.000149	0.990297
	b1	Marinomonas posidonica	2	3.2805e+07	1	3.2805e+07	8.81377	0.004451
	b1	Marinomonas posidonica	4	911250	1	911250	0.244827	0.622749
	b1	Marinomonas posidonica	6	1.93389e+06	1	1.93389e+06	0.519581	0.47413
	b1	Marinomonas posidonica	8	133472	1	133472	0.03586	0.850514
	b1	Marinomonas posidonica	10	4.06501e+07	1	4.06501e+07	10.9215	0.001693
	b1	Marinomonas posidonica	12	1.25876e+08	1	1.25876e+08	33.8192	3.3654e-07
	b1	Marinomonas posidonica	14	1.2667e+08	1	1.2667e+08	34.0327	3.1462e-07
	b1	Marinomonas posidonica	16	2.03347e+08	1	2.03347e+08	54.6336	9.5327e-10
	b9	Vibrio sp.	0	200556	1	200556	0.0477132	0.827915
	b9	Vibrio sp.	2	1.59014e+06	1	1.59014e+06	0.378302	0.541097
	b9	Vibrio sp.	4	2.58001e+07	1	2.58001e+07	6.13798	0.0163912
	b9	Vibrio sp.	6	1.445e+08	1	1.445e+08	34.3773	2.82326e-07
	b9	Vibrio sp.	8	3.34835e+07	1	3.34835e+07	7.96588	0.00665905
	b9	Vibrio sp.	10	1.07339e+07	1	1.07339e+07	2.55365	0.115876
	b9	Vibrio sp.	12	2.39201e+07	1	2.39201e+07	5.69072	0.0205925
	b9	Vibrio sp.	14	1.36125e+08	1	1.36125e+08	32.3848	5.31481e-07
	b9	Vibrio sp.	16	1.79551e+08	1	1.79551e+08	42.7161	2.33359e-08
	b11	Vibrio fortis	0	293889	1	293889	0.02728	0.86943
	b11	Vibrio fortis	2	2.14512e+07	1	2.14512e+07	1.99119	0.163952
	b11	Vibrio fortis	4	2.11494e+08	1	2.11494e+08	19.6317	4.62812e-05
	b11	Vibrio fortis	6	4.68835e+07	1	4.68835e+07	4.35192	0.0417054
	b11	Vibrio fortis	8	222222	1	222222	0.0206276	0.886333
	b11	Vibrio fortis	10	6.42014e+06	1	6.42014e+06	0.595944	0.443495
	b11	Vibrio fortis	12	7.60556e+07	1	7.60556e+07	7.05979	0.0103454
	b11	Vibrio fortis	14	1.03201e+08	1	1.03201e+08	9.57951	0.00311574
	b11	Vibrio fortis	16	8.64612e+07	1	8.64612e+07	8.02569	0.00647063
	b14	Shimia sp.	0	956806	1	956806	0.20325	0.653916
	b14	Shimia sp.	2	555.556	1	555.556	0.000118014	0.991372
	b14	Shimia sp.	4	3.07933e+08	1	3.07933e+08	65.4129	7.12011e-11
	b14	Shimia sp.	6	3.71281e+08	1	3.71281e+08	78.8696	3.83683e-12
	b14	Shimia sp.	8	5.3792e+08	1	5.3792e+08	114.268	6.12038e-15
	b14	Shimia sp.	10	8.712e+07	1	8.712e+07	18.5065	7.15152e-05
	b14	Shimia sp.	12	2.00556e+07	1	2.00556e+07	4.26031	0.0438313
	b14	Shimia sp.	14	7.34068e+07	1	7.34068e+07	15.5935	0.000229156
	b14	Shimia sp.	16	1.67235e+07	1	1.67235e+07	3.55249	0.0648424
	b15	Shimia sp.	0	73472.2	1	73472.2	0.0148925	0.903325
	b15	Shimia sp.	2	516806	1	516806	0.104754	0.747448
	b15	Shimia sp.	4	3.96681e+08	1	3.96681e+08	80.4052	2.80304e-12
	b15	Shimia sp.	6	7.22e+08	1	7.22e+08	146.346	5.31712e-17
	b15	Shimia sp.	8	3.86883e+08	1	3.86883e+08	78.4194	4.20964e-12
	b15	Shimia sp.	10	3.4445e+07	1	3.4445e+07	6.98183	0.0107507
	b15	Shimia sp.	12	3.69014e+06	1	3.69014e+06	0.747973	0.390945
	b15	Shimia sp.	14	4.65125e+06	1	4.65125e+06	0.942786	0.335892
	b15	Shimia sp.	16	6805.56	1	6805.56	0.00137945	0.97051
	b18	Pseudoalteromonas phenolica	0	40138.9	1	40138.9	0.0105184	0.918693
	b18	Pseudoalteromonas phenolica	2	13888.9	1	13888.9	0.00363957	0.952116
	b18	Pseudoalteromonas phenolica	4	245000	1	245000	0.0642021	0.800936
	b18	Pseudoalteromonas phenolica	6	2.90068e+07	1	2.90068e+07	7.60121	0.00794048
	b18	Pseudoalteromonas phenolica	8	2.47161e+08	1	2.47161e+08	64.7683	8.25796e-11
	b18	Pseudoalteromonas phenolica	10	5.74235e+07	1	5.74235e+07	15.0478	0.000286879
	b18	Pseudoalteromonas phenolica	12	1.922e+07	1	1.922e+07	5.03659	0.0289377
	b18	Pseudoalteromonas phenolica	14	4.08006e+07	1	4.08006e+07	10.6918	0.00187654
	b18	Pseudoalteromonas phenolica	16	3.90139e+07	1	3.90139e+07	10.2236	0.00231946
	b20	Pseudoalteromonas phenolica	0	605000	1	605000	0.160543	0.690238
	b20	Pseudoalteromonas phenolica	2	3.042e+07	1	3.042e+07	8.07227	0.0063278
	b20	Pseudoalteromonas phenolica	4	5.95125e+06	1	5.95125e+06	1.57923	0.214281
	b20	Pseudoalteromonas phenolica	6	1.33117e+08	1	1.33117e+08	35.324	2.10144e-07
	b20	Pseudoalteromonas phenolica	8	3.78125e+08	1	3.78125e+08	100.339	6.44029e-14
	b20	Pseudoalteromonas phenolica	10	7.16006e+07	1	7.16006e+07	19	5.90338e-05
	b20	Pseudoalteromonas phenolica	12	5.11735e+07	1	5.11735e+07	13.5794	0.000530947
	b20	Pseudoalteromonas phenolica	14	1.29337e+08	1	1.29337e+08	34.3209	2.87364e-07
	b20	Pseudoalteromonas phenolica	16	7.8125e+07	1	7.8125e+07	20.7313	3.04728e-05
	b23	Pseudophaeobacter sp.	0	23472.2	1	23472.2	0.00697569	0.933746
	b23	Pseudophaeobacter sp.	2	9.46125e+06	1	9.46125e+06	2.81178	0.0993549
	b23	Pseudophaeobacter sp.	4	3.86883e+08	1	3.86883e+08	114.978	5.4578e-15
	b23	Pseudophaeobacter sp.	6	3.70827e+08	1	3.70827e+08	110.206	1.19054e-14
	b23	Pseudophaeobacter sp.	8	4.2389e+08	1	4.2389e+08	125.976	9.81295e-16
	b23	Pseudophaeobacter sp.	10	1.43651e+08	1	1.43651e+08	42.6916	2.34999e-08
	b23	Pseudophaeobacter sp.	12	1.44217e+08	1	1.44217e+08	42.8597	2.24006e-08
	b23	Pseudophaeobacter sp.	14	1.63805e+08	1	1.63805e+08	48.6811	4.48707e-09
	b23	Pseudophaeobacter sp.	16	1.16281e+08	1	1.16281e+08	34.5575	2.66823e-07
	b25	Shimia thalassica	0	333472	1	333472	0.0404003	0.841455
	b25	Shimia thalassica	2	2.90068e+07	1	2.90068e+07	3.51419	0.0662585
	b25	Shimia thalassica	4	256806	1	256806	0.0311121	0.86065
	b25	Shimia thalassica	6	1.71742e+08	1	1.71742e+08	20.8066	2.96202e-05
	b25	Shimia thalassica	8	3.58227e+08	1	3.58227e+08	43.3994	1.92178e-08
	b25	Shimia thalassica	10	3.34111e+08	1	3.34111e+08	40.4777	4.45365e-08
	b25	Shimia thalassica	12	4.53507e+08	1	4.53507e+08	54.9425	8.81763e-10
	b25	Shimia thalassica	14	3.65851e+08	1	3.65851e+08	44.323	1.48145e-08
	b25	Shimia thalassica	16	2.603e+08	1	2.603e+08	31.5355	6.99308e-07
	b30	Thalassobius sp.	0	648.148	1	648.148	4.41723e-05	0.994726
	b30	Thalassobius sp.	2	6.08048e+06	1	6.08048e+06	0.414394	0.523015
	b30	Thalassobius sp.	4	2.41628e+08	1	2.41628e+08	16.4673	0.000194661
	b30	Thalassobius sp.	6	7.32387e+08	1	7.32387e+08	49.9133	8.16432e-09
	b30	Thalassobius sp.	8	8.62508e+08	1	8.62508e+08	58.7812	1.05719e-09
	b30	Thalassobius sp.	10	2.45488e+08	1	2.45488e+08	16.7303	0.000175936
	b30	Thalassobius sp.	12	1.4248e+08	1	1.4248e+08	9.71026	0.00318745
	b30	Thalassobius sp.	14	7.44858e+07	1	7.44858e+07	5.07632	0.0291761
	b30	Thalassobius sp.	16	2.52635e+07	1	2.52635e+07	1.72175	0.196122
	b31	Vibrio sp.	0	435556	1	435556	0.0418661	0.838568
	b31	Vibrio sp.	2	3.73556e+06	1	3.73556e+06	0.359066	0.551282
	b31	Vibrio sp.	4	2.49761e+08	1	2.49761e+08	24.0073	7.62087e-06
	b31	Vibrio sp.	6	2.70281e+08	1	2.70281e+08	25.9797	3.70393e-06
	b31	Vibrio sp.	8	1.3448e+08	1	1.3448e+08	12.9264	0.000655707
	b31	Vibrio sp.	10	4.38672e+07	1	4.38672e+07	4.21656	0.0443977
	b31	Vibrio sp.	12	1.39568e+07	1	1.39568e+07	1.34154	0.251352
	b31	Vibrio sp.	14	1.7405e+07	1	1.7405e+07	1.67299	0.200816
	b31	Vibrio sp.	16	9.20272e+07	1	9.20272e+07	8.84576	0.00422672
	b34	Alteromonas mediterranea	0	845000	1	845000	0.0757422	0.78388
	b34	Alteromonas mediterranea	2	1.71125e+06	1	1.71125e+06	0.153389	0.696385
	b34	Alteromonas mediterranea	4	2.09101e+08	1	2.09101e+08	18.7429	4.39708e-05
	b34	Alteromonas mediterranea	6	2.66805e+08	1	2.66805e+08	23.9153	5.2896e-06
	b34	Alteromonas mediterranea	8	2.73001e+08	1	2.73001e+08	24.4706	4.24536e-06
	b34	Alteromonas mediterranea	10	2.28267e+08	1	2.28267e+08	20.4609	2.14466e-05
	b34	Alteromonas mediterranea	12	4.4055e+08	1	4.4055e+08	39.489	1.74948e-08
	b34	Alteromonas mediterranea	14	3.51567e+08	1	3.51567e+08	31.513	2.91726e-07
	b34	Alteromonas mediterranea	16	1.73601e+08	1	1.73601e+08	15.5608	0.000173423
	b35	Thalassobius sp.	0	347222	1	347222	0.0920278	0.762664
	b35	Thalassobius sp.	2	3.46722e+06	1	3.46722e+06	0.918953	0.341597
	b35	Thalassobius sp.	4	2.61442e+08	1	2.61442e+08	69.2927	1.37387e-11
	b35	Thalassobius sp.	6	9.25934e+08	1	9.25934e+08	245.41	7.15995e-23
	b35	Thalassobius sp.	8	985680000	1	985680000	261.245	1.56247e-23
	b35	Thalassobius sp.	10	8.37087e+08	1	8.37087e+08	221.862	8.0282e-22
	b35	Thalassobius sp.	12	6.82036e+08	1	6.82036e+08	180.767	9.28194e-20
	b35	Thalassobius sp.	14	3.9715e+08	1	3.9715e+08	105.261	8.02689e-15
	b35	Thalassobius sp.	16	2.34361e+08	1	2.34361e+08	62.1151	7.81205e-11
	b36	Vibrio penaeicida	0	5000	1	5000	0.000304891	0.986113
	b36	Vibrio penaeicida	2	3.92e+06	1	3.92e+06	0.239034	0.626276
	b36	Vibrio penaeicida	4	2.86272e+07	1	2.86272e+07	1.74563	0.190289
	b36	Vibrio penaeicida	6	11250	1	11250	0.000686004	0.979171
	b36	Vibrio penaeicida	8	5.22722e+06	1	5.22722e+06	0.318746	0.573982
	b36	Vibrio penaeicida	10	1.33934e+08	1	1.33934e+08	8.16704	0.00546749
	b36	Vibrio penaeicida	12	5.23261e+08	1	5.23261e+08	31.9075	2.52517e-07
	b36	Vibrio penaeicida	14	4.27781e+08	1	4.27781e+08	26.0853	2.25701e-06
	b36	Vibrio penaeicida	16	5.00334e+08	1	5.00334e+08	30.5094	4.22222e-07
	b37	Thalassobius sp.	0	1.68056e+06	1	1.68056e+06	0.344511	0.559439
	b37	Thalassobius sp.	2	3.87347e+06	1	3.87347e+06	0.794056	0.376436
	b37	Thalassobius sp.	4	2.61823e+08	1	2.61823e+08	53.6734	6.93837e-10
	b37	Thalassobius sp.	6	1.14003e+09	1	1.14003e+09	233.705	2.32329e-22
	b37	Thalassobius sp.	8	1.36852e+09	1	1.36852e+09	280.544	2.69772e-24
	b37	Thalassobius sp.	10	7.8408e+08	1	7.8408e+08	160.735	1.27568e-18
	b37	Thalassobius sp.	12	5.13067e+08	1	5.13067e+08	105.178	8.14941e-15
	b37	Thalassobius sp.	14	4.15681e+08	1	4.15681e+08	85.2139	4.03916e-13
	b37	Thalassobius sp.	16	2.49761e+08	1	2.49761e+08	51.2007	1.35806e-09
	WM	Whole microbiome	0	680556	1	680556	0.044	0.834
	WM	Whole microbiome	2	1.17045e+08	1	1.17045e+08	7.587	0.008
	WM	Whole microbiome	4	5.85001e+07	1	5.85001e+07	3.792	0.057
	WM	Whole microbiome	6	1.07556e+06	1	1.07556e+06	0.07	0.793
	WM	Whole microbiome	8	9.70936e+08	1	9.70936e+08	62.94	<.001
	WM	Whole microbiome	10	2.12769e+09	1	2.12769e+09	137.926	<.001
	WM	Whole microbiome	12	3.87347e+09	1	3.87347e+09	251.094	<.001
	WM	Whole microbiome	14	3312980000	1	3312980000	214.761	<.001
	WM	Whole microbiome	16	2.48512e+09	1	2.48512e+09	161.096	<.001

## Sheet: Table S5
	Table S5: PERMANOVA, pairwise comparison of bacterial community between sampling days (Figure 2). Df = degrees of freedom; SS = sum of squares; R2 = r squared value; F = F-value; p.ajdusted = using Bonferroni-Hochberg.
	pairs	Df	SS	F	R2	p.value	p.adjusted
	d2 vs d6	1	0.226389	8.6076	0.589255	0.0291	0.0339
	d2 vs d8	1	0.269802	19.44	0.764151	0.0303	0.0339
	d2 vs d14	1	0.392094	26.4598	0.815156	0.031	0.0339
	d2 vs d4	1	0.0613838	4.65114	0.43668	0.0339	0.0339
	d6 vs d8	1	0.365903	15.0638	0.715151	0.0287	0.0339
	d6 vs d14	1	0.593397	23.5195	0.796745	0.0279	0.0339
	d6 vs d4	1	0.0922091	3.90567	0.394286	0.0284	0.0339
	d8 vs d14	1	0.0977223	7.63002	0.559795	0.0321	0.0339
	d8 vs d4	1	0.215648	19.2771	0.762631	0.0326	0.0339
	d14 vs d4	1	0.393875	32.4805	0.844077	0.0278	0.0339

## Sheet: Table S6
	Table S6: Relative abundance of bacterial Classes in Actinocyclus sp. microbiome. RA = relative abundance.
	Day	Replicates	tax.Phylum	RA (%)	Mean (day)
	2	1	Bacteroidota	45.6632	40.6356
	2	2	Bacteroidota	35.0181
	2	3	Bacteroidota	39.6086
	2	4	Bacteroidota	42.2527
	2	1	unassigned	1.25056	2.13051
	2	2	unassigned	2.33926	2.13051
	2	3	unassigned	2.31254	2.13051
	2	4	unassigned	2.61967	2.13051
	2	1	Proteobacteria	53.0862	57.2339
	2	2	Proteobacteria	62.6427	57.2339
	2	3	Proteobacteria	58.0789	57.2339
	2	4	Proteobacteria	55.1277	57.2339
	4	1	Bacteroidota	49.3809	45.9903
	4	2	Bacteroidota	44.4173	45.9903
	4	3	Bacteroidota	45.9376	45.9903
	4	4	Bacteroidota	44.2254	45.9903
	4	1	unassigned	1.55983	1.92852
	4	2	unassigned	1.7198	1.92852
	4	3	unassigned	2.39588	1.92852
	4	4	unassigned	2.03855	1.92852
	4	1	Proteobacteria	49.0593	52.0812
	4	2	Proteobacteria	53.8629	52.0812
	4	3	Proteobacteria	51.6665	52.0812
	4	4	Proteobacteria	53.7361	52.0812
	6	1	Bacteroidota	27.7338	41.2017
	6	2	Bacteroidota	37.4567	41.2017
	6	3	Bacteroidota	47.2699	41.2017
	6	4	Bacteroidota	52.3463	41.2017
	6	1	unassigned	3.13608	2.28369
	6	2	unassigned	2.57553	2.28369
	6	3	unassigned	1.95467	2.28369
	6	4	unassigned	1.46848	2.28369
	6	1	Proteobacteria	69.1301	56.5146
	6	2	Proteobacteria	59.9678	56.5146
	6	3	Proteobacteria	50.7754	56.5146
	6	4	Proteobacteria	46.1853	56.5146
	8	1	Bacteroidota	70.5074	72.7613
	8	2	Bacteroidota	71.6381	72.7613
	8	3	Bacteroidota	76.1963	72.7613
	8	4	Bacteroidota	72.7035	72.7613
	8	1	unassigned	1.19621	1.17418
	8	2	unassigned	0.959776	1.17418
	8	3	unassigned	1.39659	1.17418
	8	4	unassigned	1.14416	1.17418
	8	1	Proteobacteria	28.2964	26.0645
	8	2	Proteobacteria	27.4021	26.0645
	8	3	Proteobacteria	22.4071	26.0645
	8	4	Proteobacteria	26.1523	26.0645
	12	1	Bacteroidota	80.2305	76.0943
	12	2	Bacteroidota	73.436	76.0943
	12	3	Bacteroidota	71.9402	76.0943
	12	4	Bacteroidota	78.7706	76.0943
	12	1	unassigned	0.828232	0.982601
	12	2	unassigned	1.04628	0.982601
	12	3	unassigned	1.03138	0.982601
	12	4	unassigned	1.02451	0.982601
	12	1	Proteobacteria	18.9413	22.9231
	12	2	Proteobacteria	25.5177	22.9231
	12	3	Proteobacteria	27.0284	22.9231
	12	4	Proteobacteria	20.2049	22.9231

## Sheet: Table S7
	Table S7: Relative abundance of bacterial Phyla in Actinocyclus sp. microbiome. RA = relative abundance.
	Day	Replicates	tax.Class	RA (%)	Mean (day)
	2	1	Alphaproteobacteria	15.7124	20.7682
		2		27.9719
		3		21.1533
		4		18.235
	4	1		10.0157	12.1464
	4	2		18.7194	12.1464
	4	3		8.15305	12.1464
	4	4		11.6976	12.1464
	6	1		1.96346	4.18573
	6	2		3.19465	4.18573
	6	3		4.60677	4.18573
	6	4		6.97803	4.18573
	8	1		10.5734	12.7933
	8	2		16.575	12.7933
	8	3		9.7556	12.7933
	8	4		14.2694	12.7933
	12	1		11.8593	15.1852
	12	2		17.3945	15.1852
	12	3		20.1525	15.1852
	12	4		11.3345	15.1852
	2	1	Bacteroidia	45.6632	40.6356
	2	2		35.0181	40.6356
	2	3		39.6086	40.6356
	2	4		42.2527	40.6356
	4	1		49.3809	45.9903
	4	2		44.4173	45.9903
	4	3		45.9376	45.9903
	4	4		44.2254	45.9903
	6	1		27.7338	41.2017
	6	2		37.4567	41.2017
	6	3		47.2699	41.2017
	6	4		52.3463	41.2017
	8	1		70.5074	72.7613
	8	2		71.6381	72.7613
	8	3		76.1963	72.7613
	8	4		72.7035	72.7613
	12	1		80.2305	76.0943
	12	2		73.436	76.0943
	12	3		71.9402	76.0943
	12	4		78.7706	76.0943
	2	1	Unassigned	1.25056	2.13301
	2	2		2.33926	2.13301
	2	3		2.32255	2.13301
	2	4		2.61967	2.13301
	4	1		1.55983	1.94081
	4	2		1.73303	1.94081
	4	3		2.41702	1.94081
	4	4		2.05337	1.94081
	6	1		3.13608	2.30126
	6	2		2.61268	2.30126
	6	3		1.95467	2.30126
	6	4		1.5016	2.30126
	8	1		1.2512	1.19307
	8	2		0.959776	1.19307
	8	3		1.41713	1.19307
	8	4		1.14416	1.19307
	12	1		0.828232	0.987289
	12	2		1.04628	0.987289
	12	3		1.05013	0.987289
	12	4		1.02451	0.987289
	2	1	Gammaproteobacteria	37.3738	36.4632
	2	2		34.6707	36.4632
	2	3		36.9156	36.4632
	2	4		36.8926	36.4632
	4	1		39.0436	39.9225
	4	2		35.1303	39.9225
	4	3		43.4924	39.9225
	4	4		42.0237	39.9225
	6	1		67.1666	52.3114
	6	2		56.736	52.3114
	6	3		46.1687	52.3114
	6	4		39.1741	52.3114
	8	1		17.6681	13.2523
	8	2		10.8271	13.2523
	8	3		12.6309	13.2523
	8	4		11.883	13.2523
	12	1		7.08198	7.73319
		2		8.12323
		3		6.85711
		4		8.87044

## Sheet: Table S8
	Table S8: Proportion of the different bacterial isolates within Actinocyclus sp. microbiome.
	Day	Replicates (%)	Mean (%)
	2	9.52211	13.7309
		19.1465
		14.6611
		12.2352
	4	6.34877	7.94076
	4	12.6736
	4	4.62265
	4	7.09414
	6	1.67162	2.71241
	6	3.04671
	6	3.93066
	6	0.736297
	8	6.90224	8.33746
	8	11.0859
	8	5.97659
	8	8.95718
	12	7.97023	10.6638
		11.778
		13.933
		8.07937

## Sheet: Table S9
	Table S9: Dunnett test comparison of the growth rate between each co-cultures and their corresponding axenic and whole microbiome controls. Std.Error = standard error ; t-value = test statistic value.
	Comparison	Estimate	Std. Error	t value (ax)	adjusted p-value
	Marinomonas posidonica strain b1 - Axenic	0.0584529	0.0244262	2.39304	0.143124
	Vibrio fortis strain b11 - Axenic	0.0932905	0.0244262	3.81928	0.00474775
	Shimia sp. strain b14 - Axenic	0.139482	0.0244262	5.71036	2.08043e-05
	Shimia sp. strain b15 - Axenic	0.159816	0.0244262	6.54283	3.44281e-06
	Pseudoalteromonas phenolica strain b18 - Axenic	0.0719866	0.0244262	2.94711	0.0430361
	Pseudoalteromonas phenolica strain b20 - Axenic	0.186926	0.0244262	7.65267	4.57909e-08
	Pseudophaeobacter sp strain b23 - Axenic	0.102623	0.0244262	4.20134	0.00174448
	Shimia thalassica strain b25 - Axenic	0.187908	0.0244262	7.69288	2.65718e-08
	Thalassobius sp. strain b30 - Axenic	0.210683	0.0263833	7.98548	8.3358e-09
	Vibrio sp. strain b9 - Axenic	-0.0114105	0.0244262	-0.46714	0.999626
	Alteromonas mediterranea strain b34 - Axenic	0.115018	0.0124766	9.21873	1.32491e-05
	Vibrio penaeicida strain b36 - Axenic	0.0314307	0.0124766	2.51918	0.0581818
	Vibrio sp. strain b31 - Axenic	0.0655466	0.0143835	4.55708	0.00181246
	Thalassobius sp. strain b35 - Axenic	0.205742	0.0143835	14.3041	3.19698e-11
	Thalassobius sp. strain b37 - Axenic	0.219941	0.0143835	15.2913	1.25677e-13
	Marinomonas posidonica strain b1 - Whole microbiome	-0.0970698	0.0259051	-3.74713	0.00579109
	Vibrio fortis strain b11 - Whole microbiome	-0.00346382	0.0259051	-0.133712	1
	Shimia sp. strain b14 - Whole microbiome	-0.0785449	0.0259051	-3.03203	0.0363953
	Shimia sp. strain b15 - Whole microbiome	-0.0582108	0.0259051	-2.24708	0.199052
	Pseudoalteromonas phenolica strain b18 - Whole microbiome	-0.146041	0.0259051	-5.63753	1.99409e-05
	Pseudoalteromonas phenolica strain b20 - Whole microbiome	-0.0311018	0.0259051	-1.2006	0.838743
	Pseudophaeobacter sp strain b23 - Whole microbiome	-0.115405	0.0259051	-4.4549	0.000805365
	Shimia thalassica strain b25 - Whole microbiome	-0.0301195	0.0259051	-1.16269	0.860377
	Thalassobius sp. strain b30 - Whole microbiome	-0.00734384	0.0279807	-0.262461	0.999999
	Vibrio sp. strain b9 - Whole microbiome	-0.186224	0.0259051	-7.18869	1.34312e-07
	Alteromonas mediterranea strain b34 - Whole microbiome	-0.041635	0.0136507	-3.05003	0.0260533
	Vibrio penaeicida strain b36 - Whole microbiome	-0.0690957	0.0136507	-5.0617	0.000624548
	Vibrio sp. strain b31 - Whole microbiome	-0.177679	0.0148211	-11.9882	1.01595e-09
	Thalassobius sp. strain b35 - Whole microbiome	-0.0600678	0.0148211	-4.05285	0.00362184
	Thalassobius sp. strain b37 - Whole microbiome	-0.0458686	0.0148211	-3.09481	0.0243679

## Sheet: Table S10
	Table S10: Algae and Bacteria abundance in co-culture over time. SD = standard deviation of the mean, SEM = Standard Error of the Mean.
	ID	day	Algae cells/mL	Algae SD	Algae SEM	Bacteria cells/mL	Bacteria SD	Bacteria SEM	Bacteria Control cells/mL	Bacteria control SD	Bacteria control SEM	Batch
	Axenic	0	5208.33	409.494	204.747	-	-	-	-	-	-	a
		2	13916.7	753.019	376.509	-	-	-	-	-	-
		4	18116.7	1118.37	559.183	-	-	-	-	-	-
		6	29175	3051.09	1525.55	-	-	-	-	-	-
		8	32591.7	1437.69	718.844	-	-	-	-	-	-
		10	37200	2252.41	1126.2	-	-	-	-	-	-
		12	35016.7	3720.86	1860.43	-	-	-	-	-	-
		14	31575	1898.22	949.11	-	-	-	-	-	-
		16	30350	2141.91	1070.95	-	-	-	-	-	-
	Whole microbiome	0	4625	334.858	167.429	740380	9193.65	4596.82	-	-	-	a
		2	6266.67	198.139	99.0697	1308700	83752.9	41876.4	-	-	-
		4	12708.3	767.089	383.545	3652900	195061	97530.4	-	-	-
		6	28441.7	2805.73	1402.87	9222300	720657	360328	-	-	-
		8	54625	6893.23	3446.61	15394400	1.33629e+06	668146	-	-	-
		10	69816.7	4347.88	2173.94	19188500	1.14601e+06	573005	-	-	-
		12	79025	8335.88	4167.94	24373400	1.58248e+06	791242	-	-	-
		14	72275	6252.9	3126.45	26671700	638638	319319	-	-	-
		16	65600	7320.19	3660.1	28192700	1.57294e+06	786471	-	-	-
	Marinomonas posidonica strain b1	0	5225	452.462	226.231	1000	100	-	1000	100	-	a
		2	9866.67	733.838	366.919	461600	45352.5	22676.3	60960	33500.5	16750.3
		4	18791.7	694.622	347.311	2125300	283672	141836	171140	13904.3	6952.15
		6	28191.7	1126.24	563.122	3225100	126551	63275.4	220120	12607	6303.5
		8	32850	2900.51	1450.26	3284100	357913	178956	244880	7902.47	3951.24
		10	41708.3	1926.69	963.344	2736600	475500	237750	282620	30061.7	15030.8
		12	42950	2444.72	1222.36	2767800	133111	66555.3	322070	29802.8	14901.4
		14	39533.3	1331.94	665.972	2515900	388608	194304	325550	28725.4	14362.7
		16	40433.3	2038.52	1019.26	2180200	135311	67655.7	340690	18075.3	9037.65
	Vibrio fortis strain b11	0	4825	552.687	276.344	1000	100	-	1000	100	-	a
		2	10641.7	615.464	307.732	348133	38734.7	22363.5	87850	2039.71	1019.85
		4	7833.33	702.904	351.452	1491600	524864	303030	99790	2470.17	1235.08
		6	24333.3	4945.11	2472.55	3609200	119822	69179.2	112660	4804.28	2402.14
		8	32925	6205.1	3102.55	5.08867e+06	102551	59207.8	123230	6954.13	3477.06
		10	38991.7	6013.83	3006.92	5173600	205192	118468	131310	9283.53	4641.76
		12	41183.3	4570.8	2285.4	4.99267e+06	589747	340491	135540	7164.99	3582.49
		14	38758.3	5063.4	2531.7	6.01267e+06	665438	384191	135980	8626.32	4313.16
		16	36925	2571.41	1285.7	6272000	348483	201197	132630	13168.9	6584.47
	Shimia sp. strain b14	0	5900	441.378	220.689	1000	100	-	1000	100	-	a
		2	13933.3	1378.4	689.202	1692100	190433	95216.6	343160	46244.5	23122.3
		4	30525	1538.73	769.364	3341400	252962	126481	288200	37752.3	18876.1
		6	42800	1524.37	762.185	4430800	269863	134932	289550	53285.6	26642.8
		8	48991.7	409.494	204.747	5825300	548377	274188	295420	30308	15154
		10	43800	4057.09	2028.55	6768300	593036	296518	295390	27543.5	13771.8
		12	38183.3	2838.43	1419.21	7726200	862956	431478	336990	15489.9	7744.94
		14	37633.3	476.095	238.048	10074900	1.73998e+06	869992	359620	22075.8	11037.9
		16	33241.7	3545.09	1772.55	9318400	536473	268236	398050	44027.4	22013.7
	Shimia sp. strain b15	0	5400	241.906	120.953	1000	100	-	1000	100	-	a
		2	14425	1043.28	521.638	739400	65215.5	32607.8	79910	10647.8	5323.92
		4	32200	1773.68	886.838	1714200	97018.2	48509.1	83620	8758.36	4379.18
		6	48175	2548.4	1274.2	3420900	170863	85431.5	84900	5484.57	2742.29
		8	46500	4429.03	2214.51	5328500	135002	67500.8	90040	2775.32	1387.66
		10	41350	2319.4	1159.7	7048400	646155	323077	93650	1339.2	669.602
		12	36375	1752.75	876.375	7994900	422187	211094	97220	5492.93	2746.46
		14	33100	2585.86	1292.93	9553700	1.0266e+06	513299	108740	12035.7	6017.87
		16	30291.7	1670.52	835.262	10052400	592489	296244	123570	6257.7	3128.85
	Pseudoalteromonas phenolica strain b18	0	5066.67	577.991	288.996	1000	100	-	1000	100	-	a
		2	14000	237.268	118.634	1105800	104982	52491.1	73860	2027.15	1013.57
		4	18466.7	1004.43	502.217	3487800	223544	111772	86770	4092.97	2046.48
		6	32983.3	2120.53	1060.27	4684900	274327	137164	88500	7785.42	3892.71
		8	43708.3	1608.4	804.199	6076600	132945	66472.4	81450	13139.1	6569.55
		10	42558.3	2004.14	1002.07	7193600	470287	235143	73820	11166.9	5583.46
		12	38116.7	2531.94	1265.97	6951000	449384	224692	74560	9206.49	4603.25
		14	36091.7	1310.75	655.373	7365300	404227	202114	65440	2732.33	1366.16
		16	34766.7	2755.06	1377.53	8335800	427282	213641	75300	7162.31	3581.15
	Pseudoalteromonas phenolica strain b20	0	5758.33	341.429	170.715	1000	100	-	1000	100	-	a
		2	10016.7	526.695	263.347	1.14693e+06	38483.9	22218.7	70910	8475.43	4237.72
		4	19841.7	1889.42	944.71	3106400	199870	115395	76930	7462.79	3731.39
		6	37333.3	2290.88	1145.44	4337600	518176	299169	87860	1671.25	835.624
		8	46341.7	2511.36	1255.68	5.82653e+06	464353	268094	96100	3616.33	1808.17
		10	43183.3	1392.71	696.353	6287600	248398	143413	83870	1794.92	897.459
		12	40075	1564.74	782.372	6.27827e+06	174255	100606	84770	2986.44	1493.22
		14	39616.7	1792.68	896.34	6.88933e+06	641881	370590	75630	6082.66	3041.33
		16	36600	2059.31	1029.65	7.60453e+06	720553	416012	74290	5413.9	2706.95
	Pseudophaeobacter sp. strain b23	0	5316.67	528.8	264.4	1000	100	-	1000	100	-	a
		2	16091.7	675.154	337.577	945790	99314.5	49657.2	214780	5779.64	2889.82
		4	32025	1451.53	725.766	2274300	138939	69469.7	170320	7446.52	3723.26
		6	42791.7	1777.09	888.546	5340300	384573	192286	160930	11256.4	5628.22
		8	47150	933.928	466.964	8278700	220037	110019	150430	10848.3	5424.13
		10	45675	1311.88	655.938	10427400	486599	243300	122460	12433.2	6216.59
		12	43508.3	3265.12	1632.56	12933400	1.07787e+06	538935	125660	12784.6	6392.28
		14	40625	439.17	219.585	14739000	1.01668e+06	508340	146610	15805.5	7902.73
		16	37975	805.709	402.854	17310000	1.32625e+06	663126	130920	16177.1	8088.56
	Shimia thalassica strain b25	0	4800	146.566	73.2828	1000	100	-	1000	100	-	a
		2	10108.3	512.348	256.174	34630	15302.1	7651.03	15560	1468.97	734.484
		4	17758.3	740.058	370.029	3777100	284604	142302	972090	243322	121661
		6	38441.7	8785.15	4392.57	8311000	631193	315596	2642830	713701	356850
		8	45975	3253.53	1626.77	11326400	700335	350167	3503760	352901	176450
		10	50125	2424.16	1212.08	13558500	1.0875e+06	543751	3609050	269519	134760
		12	50075	2722.52	1361.26	17267000	582033	291016	5197510	226623	113312
		14	45100	1923.54	961.769	23258100	456872	228436	7876590	214596	107298
		16	41758.3	1587.54	793.769	28515100	1.76738e+06	883688	10672700	742009	371005
	Thalassobius sp. strain b30	0	5188.89	443.889	256.279	1000	100	-	1000	100	-	a
		2	12033.3	218.581	126.198	1423200	129760	64880	12866.7	3139.77	1812.75
		4	29988.9	3024.04	1745.93	1891600	110593	55296.3	111067	4430.14	2557.74
		6	49844.4	9344.18	5394.86	5157100	1.06435e+06	532176	131733	4615.16	2664.57
		8	55022.2	8117.63	4686.72	8349000	2.2836e+06	1.1418e+06	151293	13243.4	7646.08
		10	49166.7	8318.72	4802.82	12122900	3.45541e+06	1.72771e+06	157827	16375.7	9454.49
		12	44133.3	4743.77	2738.82	15441100	4.63396e+06	2.31698e+06	220053	17694.7	10216
		14	38166.7	2883.48	1664.78	17321300	6.58147e+06	3.29074e+06	212840	9506.12	5488.36
		16	34188.9	2612.01	1508.04	18361100	7.23246e+06	3.61623e+06	240827	18345	10591.5
	Vibrio sp. strain b9	0	5525	137.1	68.5498	1000	100	-	1000	100	-	a
		2	14808.3	1054.58	527.288	304300	20133.9	10066.9	69030	5868.64	2934.32
		4	14525	3572.88	1786.44	1441900	48353.6	24176.8	72100	9434.15	4717.08
		6	20675	1419.02	709.509	2475000	116556	58278.1	85800	9131.05	4565.52
		8	28500	1892.48	946.24	3161000	218659	109329	98880	1387.18	693.59
		10	34883.3	1989.7	994.848	3466700	174932	87466.2	109090	3329.6	1664.8
		12	38475	1912.99	956.496	3557300	198042	99020.9	116280	12599.8	6299.9
		14	39825	1446.93	723.466	3080200	268807	134404	126630	6874.91	3437.46
		16	39825	2446.67	1223.34	3433800	1.03866e+06	519331	127950	15509.2	7754.59
	Axenic	0	4466.67	-	-	-	-	-	-	-	-	b
		2	10458.3	242.479	121.24	-	-	-	-	-	-
		4	15175	1050	525	-	-	-	-	-	-
		6	27591.7	1239.59	619.793	-	-	-	-	-	-
		8	33458.3	3143.64	1571.82	-	-	-	-	-	-
		10	35683.3	1824.42	912.211	-	-	-	-	-	-
		12	31450	1368.56	684.281	-	-	-	-	-	-
		14	33691.7	2407.15	1203.57	-	-	-	-	-	-
		16	31966.7	1972.4	986.201	-	-	-	-	-	-
	Whole microbiome	0	5666.67	-	-	994320	-	-	-	-	-	b
		2	9325	585.235	292.617	2959200	313097	156549	-	-	-
		4	26850	2264.95	1132.48	5589400	623362	220392	-	-	-
		6	59475	1483.58	741.792	10657400	231672	81908.5	-	-	-
		8	76125	4511.42	2255.71	16075200	1.10898e+06	554492	-	-	-
		10	78083.3	434.187	217.094	24838500	3.37064e+06	1.68532e+06	-	-	-
		12	70041.7	3587.36	1793.68	27959000	5.77738e+06	2.04261e+06	-	-	-
		14	62708.3	6945.52	3472.76	29452000	3.60441e+06	1.80221e+06	-	-	-
		16	53883.3	4727.74	2363.87	32495200	2.45473e+06	1.22736e+06	-	-	-
	Alteromonas mediterranea strain b34	0	5766.67	-	-	1000	100	-	1000	100	-	b
		2	11383.3	439.275	219.638	901300	42237.9	21118.9	202740	14737	7368.48
		4	25400	897.321	448.661	3074100	409174	204587	158280	3497.66	1748.83
		6	39141.7	3079.97	1539.98	3071500	172760	86379.8	148850	5115.97	2557.99
		8	45141.7	2978.86	1489.43	2701600	247609	123805	162400	2208.59	1104.29
		10	46366.7	1709.88	854.942	2.03393e+06	1.27448e+06	520304	178990	2938.37	1469.18
		12	46291.7	664.092	332.046	1385520	661787	295960	161190	13005.2	6502.58
		14	46950	2274.58	1137.29	1313900	209966	104983	170990	8594.1	4297.05
		16	41283.3	3692.89	1846.44	906000	256966	128483	175500	13864.4	6932.18
	Vibrio penaeicida strain b36	0	4566.67	-	-	1000	100	-	1000	100	-	b
		2	11858.3	846.069	423.035	903400	133077	66538.3	144510	33402.3	16701.2
		4	11391.7	404.946	202.473	3949700	139097	69548.5	2985030	359863	179931
		6	27666.7	1175.99	587.997	3835300	123255	61627.3	5919750	657515	328758
		8	35075	2248.68	1124.34	4971400	193128	96564	5425930	766021	383010
		10	43866.7	1144.07	572.033	3831500	507175	253587	7362110	359291	179646
		12	47625	1149.03	574.517	2580500	147970	73984.9	4606790	943037	471518
		14	48316.7	2165.47	1082.73	2776300	320929	160464	4695650	2.27176e+06	1.13588e+06
		16	47783.3	2470.94	1235.47	3563400	332048	166024	4343660	2.25385e+06	1.12693e+06
	Axenic	0	4766.67	-	-	-	-	-	-	-	-	c
		2	12491.7	479.487	239.743	-	-	-	-	-	-
		4	18691.7	844.317	422.158	-	-	-	-	-	-
		6	23875	1670.97	835.483	-	-	-	-	-	-
		8	29850	2970.28	1485.14	-	-	-	-	-	-
		10	34883.3	3506.45	1753.22	-	-	-	-	-	-
		12	37508.3	2307.38	1153.69	-	-	-	-	-	-
		14	37416.7	2160.68	1080.34	-	-	-	-	-	-
		16	36058.3	1662.75	831.373	-	-	-	-	-	-
	Whole microbiome	0	5000	-	-	-	-	-	-	-	-	c
		2	10408.3	946.876	473.438	9016400	523105	261553	-	-	-
		4	32408.3	1530.52	765.261	19649900	6.24381e+06	3.12191e+06	-	-	-
		6	65875	2974.26	1487.13	40383900	6.10567e+06	3.05283e+06	-	-	-
		8	97866.7	6625.88	3312.94	49747800	6.58286e+06	3.29143e+06	-	-	-
		10	119083	4488.88	2244.44	56437000	7.48323e+06	3.74161e+06	-	-	-
		12	121967	6758.53	3379.27	68606000	8.94329e+06	4.47164e+06	-	-	-
		14	-	-	-	-	-	-	-	-	-
		16	-	-	-	-	-	-	-	-	-
	Vibrio sp. strain b31	0	5700	-	-	1000	100	-	1000	100	-	c
		2	13858.3	653.976	326.988	170336	30898.9	13818.4	89140	6763.55	3381.77
		4	7516.67	973.919	486.96	2054000	115237	57618.3	97220	5470.26	2735.13
		6	12250	423.827	211.914	2416900	160971	80485.3	101070	2786.9	1393.45
		8	21650	518.188	259.094	2505900	84498.4	42249.2	113740	7623.3	3811.65
		10	30200	874.325	437.163	2531300	126181	63090.7	115960	5594.95	2797.48
		12	40150	712.585	356.293	3535600	204153	102076	121250	4821.33	2410.66
		14	40366.7	2128.29	1064.15	3469700	943188	471594	80180	5090.17	2545.09
		16	42841.7	1632.4	816.199	5814400	5.03185e+06	2.51593e+06	70460	6307.2	3153.6
	Thalassobius sp. strain b35	0	5600	-	-	1000	100	-	1000	100	-	c
		2	11175	553.357	276.678	1126050	35385.3	17692.6	209930	12460.6	6230.28
		4	30125	1123.94	561.97	2333900	136821	68410.6	189860	11715.8	5857.91
		6	45391.7	2077.99	1039	5028100	242578	121289	192840	9082.79	4541.39
		8	52050	1170.79	585.393	8002800	442945	221472	191320	8445.65	4222.83
		10	55341.7	2922.88	1461.44	9135700	791477	395739	185020	7428.7	3714.35
		12	55975	1265.02	632.51	10771200	476961	238481	247490	3603.31	1801.66
		14	51508.3	2644.4	1322.2	11886800	736729	368365	217470	10526.6	5263.32
		16	46883.3	2379.31	1189.65	13284800	740565	370282	213570	11915.5	5957.75
	Thalassobius sp. strain b37	0	6600	-	-	1000	100	-	1000	100	-	c
		2	11100	630.696	315.348	818440	26322.2	13161.1	124560	8125.88	4062.94
		4	30133.3	995.546	497.773	1463000	33569	16784.5	88580	5592.04	2796.02
		6	47750	3271.03	1635.51	3495100	291822	145911	108270	3697.4	1848.7
		8	56008.3	2288.36	1144.18	6915300	461022	230511	100980	9211.04	4605.52
		10	54683.3	3330.5	1665.25	7256600	556854	278427	127310	2479.87	1239.93
		12	53525	1397.98	698.991	8011800	426416	213208	141620	8802.7	4401.35
		14	51833.3	4630.89	2315.45	8437800	549624	274812	117590	4701.82	2350.91
		16	47233.3	1174.1	587.052	8459400	633481	316741	132620	6449.02	3224.51

[truncated: 6 more sheets: Table S11, Table S12, Tables S13-S14, Table S15, Table S16, Table S17]
